# Supplementary material
Source: Springer Nature journal article supplement (http://www.springermedizin.de/resource/supplementary/12947_2008_196_MOESM4_ESM.pdf/9556430)

25  
20  
15  
10  
5  
0

**PNS**

**PNS**

**Controls**  
**LV Strain**

**Basal**

**Apical**

**Rest**

**HG**

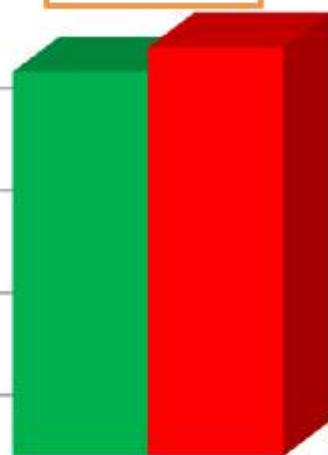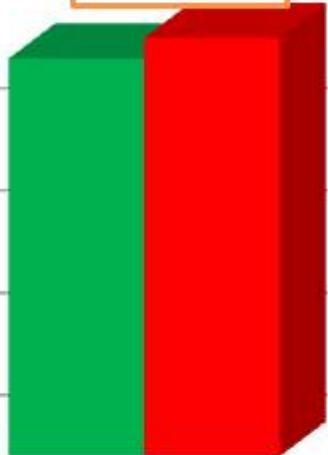

Supplement: MOESM4 [file 9556430]
